# Supplementary material for: Mosquitoes provide a transmission route between possums and humans for Buruli ulcer in southeastern Australia
Source: PubMed Central journal article supplement (PMC10847040; doi:10.1038/s41564-023-01553-1), 2024-01-23
Supplement: 41564_2023_1553_MOESM1_ESM.pdf [file 41564_2023_1553_MOESM1_ESM.pdf]

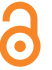

---

# Mosquitoes provide a transmission route between possums and humans for Buruli ulcer in southeastern Australia

---

In the format provided by the authors and unedited

---

**List of supplementary materials:****Tables**

- Supplementary Table 1 | Male mosquitoes collected and screened for *M. ulcerans* on the Mornington Peninsula.
- Supplementary Table 2 | *M. ulcerans* qPCR testing results for positive IS2404, IS2606 and KR in *Ae. notoscriptus*, *Ae. camptorhynchus* and *C. hilli*.
- Supplementary Table 3 | Breakdown of the number of individual or pools of female *Ae. notoscriptus* screened each year.

**Figures**

- Supplementary Fig. 1 | Maximum likelihood phylogenetic tree based on an 871 bp region of the COI gene.
- Supplementary Fig. 2 | IS2404 qPCR synthetic positive control
- Supplementary Fig. 3 | IS2404 qPCR standard curve

**Datasets**

- Supplementary dataset 1 | Mosquito trapping details
- Supplementary dataset 2 | Accession details for *M. ulcerans* DNA sequence reads used in this study
- Supplementary dataset 3 | *M. ulcerans* SNP alleles used for phylogenomic inference
- Supplementary dataset 4 | Oligonucleotide sequences of RNA baits used for *M. ulcerans* genome-enrichment sequencing.

**Source Data file**

- Source data | Extended Fig. 2

**Supplementary Table 1 |** Male mosquitoes collected and screened for *M. ulcerans* on the Mornington Peninsula.

| Species                     | No. collected/No. screened (No. positive for <i>M. ulcerans</i> ) |                   |                   |                   |                   | Total     |
|-----------------------------|-------------------------------------------------------------------|-------------------|-------------------|-------------------|-------------------|-----------|
|                             | Dec 16-<br>Apr 17                                                 | Nov 17-<br>May 18 | Dec 18-<br>May 19 | Nov 19-<br>Mar 20 | Feb 21-<br>Mar 21 |           |
| <i>Ae. notoscriptus</i>     |                                                                   | 2/2               | 7/7               | 44/24             | 5/5               | 58/38     |
| <i>Ae. rubrithorax</i>      |                                                                   |                   | 1/1               |                   |                   | 1/1       |
| <i>Cq. linealis</i>         | 9/9                                                               | 24/24             |                   | 67/17             |                   | 100/50    |
| <i>Cx. australicus</i>      |                                                                   | 11/11             | 2/2               | 303/16            |                   | 316/29    |
| <i>Cx. globocoxitus</i>     |                                                                   |                   |                   | 619/175           |                   | 619/175   |
| <i>Cx. molestus</i>         | 1/1                                                               |                   | 7/7               | 69/14             | 2/2               | 79/24     |
| <i>Cx. quinquefasciatus</i> |                                                                   | 32/32             | 1/1               | 108/76            |                   | 141/109   |
| <i>Tp. tasmaniensis</i>     |                                                                   |                   |                   | 3/3               |                   | 3/3       |
| Total                       | 10/10                                                             | 69/69             | 18/18             | 1,213/325         | 7/7               | 1,317/429 |

**Supplementary Table 2 | *Mycobacterium ulcerans* qPCR testing results for positive IS2404, IS2606 and KR in *Ae. notoscriptus*, *Ae. camptorhynchus* and *C. hilli*.**

| Species (season collected)        | Location         | qPCR assay |                 |       | <i>M. ulcerans</i> genome equivalents/mosquito <sup>1</sup> |
|-----------------------------------|------------------|------------|-----------------|-------|-------------------------------------------------------------|
|                                   |                  | IS2404     | IS2606          | KR    |                                                             |
| <i>Ae. notoscriptus</i> (16/17)   | Sorrento         | 33.64      | 35.18           | 34.94 | 401                                                         |
| <i>Ae. notoscriptus</i> (16/17)   | Tootgarook       | 36.41      | -               | -     | 76                                                          |
| <i>Ae. notoscriptus</i> (17/18)   | Capel Sound      | 38.21      | -               | -     | 26                                                          |
| <i>Ae. notoscriptus</i> (17/18)   | Capel Sound      | 36.34      | NT <sup>2</sup> | -     | 79                                                          |
| <i>Ae. notoscriptus</i> (17/18)   | Capel Sound      | 38.27      | -               | -     | 25                                                          |
| <i>Ae. notoscriptus</i> (17/18)   | Capel Sound      | 36.89      | -               | -     | 57                                                          |
| <i>Ae. notoscriptus</i> (17/18)   | St Andrews Beach | 35.02      | -               | -     | 175                                                         |
| <i>Ae. notoscriptus</i> (17/18)   | Tootgarook       | 32.62      | NT              | 32.18 | 740                                                         |
| <i>Ae. notoscriptus</i> (17/18)   | Tootgarook       | 38.22      | NT              | -     | 25                                                          |
| <i>Ae. notoscriptus</i> (17/18)   | Tootgarook       | 33.40      | -               | 34.76 | 463                                                         |
| <i>Ae. notoscriptus</i> (18/19)   | Rye              | 36.79      | NT              | 32.31 | 60                                                          |
| <i>Ae. notoscriptus</i> (18/19)   | Rye              | 36.67      | NT              | 35.91 | 65                                                          |
| <i>Ae. notoscriptus</i> (18/19)   | Rye              | 36.06      | NT              | -     | 93                                                          |
| <i>Ae. notoscriptus</i> (18/19)   | Rye              | 35.56      | 39.371          | 34.95 | 126                                                         |
| <i>Ae. notoscriptus</i> (18/19)   | Rye              | 36.34      | NT              | 35.61 | 79                                                          |
| <i>Ae. notoscriptus</i> (18/19)   | Rye              | 36.07      | 38.01           | 35.41 | 93                                                          |
| <i>Ae. notoscriptus</i> (18/19)   | Rye              | 33.70      | 32.49           | 31.62 | 386                                                         |
| <i>Ae. notoscriptus</i> (18/19)   | Rye              | 29.74      | 38.36           | 33.36 | 4183                                                        |
| <i>Ae. notoscriptus</i> (18/19)   | Rye              | 31.51      | 38.90           | 33.67 | 1443                                                        |
| <i>Ae. notoscriptus</i> (18/19)   | Rye              | 36.89      | NT              | -     | 57                                                          |
| <i>Ae. notoscriptus</i> (18/19)   | Rye              | 33.32      | 39.00           | 35.92 | 486                                                         |
| <i>Ae. notoscriptus</i> (18/19)   | Rye              | 37.25      | -               | 35.80 | 46                                                          |
| <i>Ae. notoscriptus</i> (18/19)   | Rye              | 35.11      | -               | 34.19 | 165                                                         |
| <i>Ae. notoscriptus</i> (18/19)   | Rye              | 36.44      | 40.07           | 35.02 | 74                                                          |
| <i>Ae. notoscriptus</i> (18/19)   | Rye              | 35.27      | 45.00           | 35.49 | 150                                                         |
| <i>Ae. notoscriptus</i> (19/20)   | Blairgowrie      | 35.60      | 37.90           | 33.02 | 123                                                         |
| <i>Ae. notoscriptus</i> (19/20)   | Blairgowrie      | 38.56      | 39.89           | -     | 21                                                          |
| <i>Ae. notoscriptus</i> (19/20)   | Blairgowrie      | 37.45      | 38.58           | 35.23 | 40                                                          |
| <i>Ae. notoscriptus</i> (19/20)   | Rye              | 38.11      | 39.96           | 38.86 | 27                                                          |
| <i>Ae. notoscriptus</i> (19/20)   | Rye              | 35.14      | 39.55           | -     | 163                                                         |
| <i>Ae. notoscriptus</i> (19/20)   | Rye              | 39.15      | -               | -     | 15                                                          |
| <i>Ae. notoscriptus</i> (19/20)   | Rye              | 33.02      | 35.18           | 32.44 | 582                                                         |
| <i>Ae. notoscriptus</i> (19/20)   | Rye              | 36.76      | 37.03           | 35.15 | 61                                                          |
| <i>Ae. notoscriptus</i> (19/20)   | Rye              | 37.96      | 38.67           | 33.48 | 30                                                          |
| <i>Ae. notoscriptus</i> (19/20)   | Rye              | 36.09      | 34.62           | 32.86 | 92                                                          |
| <i>Ae. notoscriptus</i> (19/20)   | Rye              | 37.86      | 39.25           | 39.26 | 32                                                          |
| <i>Ae. notoscriptus</i> (19/20)   | Rye              | 36.51      | 36.79           | 34.07 | 71                                                          |
| <i>Ae. notoscriptus</i> (19/20)   | Sorrento         | 37.73      | 37.08           | 34.86 | 34                                                          |
| <i>Ae. notoscriptus</i> (19/20)   | Sorrento         | 38.51      | 38.80           | 36.34 | 21                                                          |
| <i>Ae. notoscriptus</i> (20/21)   | Blairgowrie      | 33.47      | 34.52           | 29.36 | 489                                                         |
| <i>Ae. notoscriptus</i> (20/21)   | Blairgowrie      | 34.15      | 35.05           | 30.10 | 295                                                         |
| <i>Ae. notoscriptus</i> (20/21)   | Blairgowrie      | 38.64      | 40.21           | 35.24 | 20                                                          |
| <i>Ae. notoscriptus</i> (20/21)   | Blairgowrie      | 31.20      | 33.26           | 28.52 | 1738                                                        |
| <i>Ae. notoscriptus</i> (20/21)   | Blairgowrie      | 39.65      | -               | -     | 11                                                          |
| <i>Ae. notoscriptus</i> (20/21)   | Rye              | 37.50      | -               | NT    | 39                                                          |
| <i>Ae. notoscriptus</i> (20/21)   | Rye              | 37.48      | -               | -     | 40                                                          |
| <i>Ae. camptorhynchus</i> (19/20) | Sorrento         | 41.21      | 43.10           | 35.25 |                                                             |
| <i>C. hilli</i> (18/19)           | Rye              | 35.9215    | 34.69           | -     |                                                             |
| <i>C. hilli</i> (18/19)           | Rye              | 37.541     | -               | 38.26 |                                                             |

<sup>1</sup> Note that insect DNA was eluted in 100uL and 2uL was used for qPCR; <sup>2</sup> NT = Not tested

**Supplementary Table 3** | Breakdown of the number of individual or pools of female *Ae. notoscriptus* that were screened each year.

| Year    | Screening size                                                      | No. individuals or pools | Number positive |
|---------|---------------------------------------------------------------------|--------------------------|-----------------|
| 2016-17 | Individuals screened                                                | 4                        | 1               |
|         | Pools <15 (total no <i>Ae. notoscriptus</i> screened in pools 170)  | 23                       | 1               |
| 2017-18 | Individuals screened                                                | 367                      | 8               |
|         | Pools <15                                                           | 0                        | 0               |
| 2018-19 | Individuals screened                                                | 112                      | 3               |
|         | Pools <15 (total no <i>Ae. notoscriptus</i> screened in pools 1667) | 341                      | 12              |
| 2019-20 | Individuals screened                                                | 448                      | 3               |
|         | Pools <15 (total no <i>Ae. notoscriptus</i> screened in pools 3882) | 383                      | 11              |
| 2021    | Individuals screened                                                | 1247                     | 7               |
|         | Pools <15                                                           | 0                        | 0               |

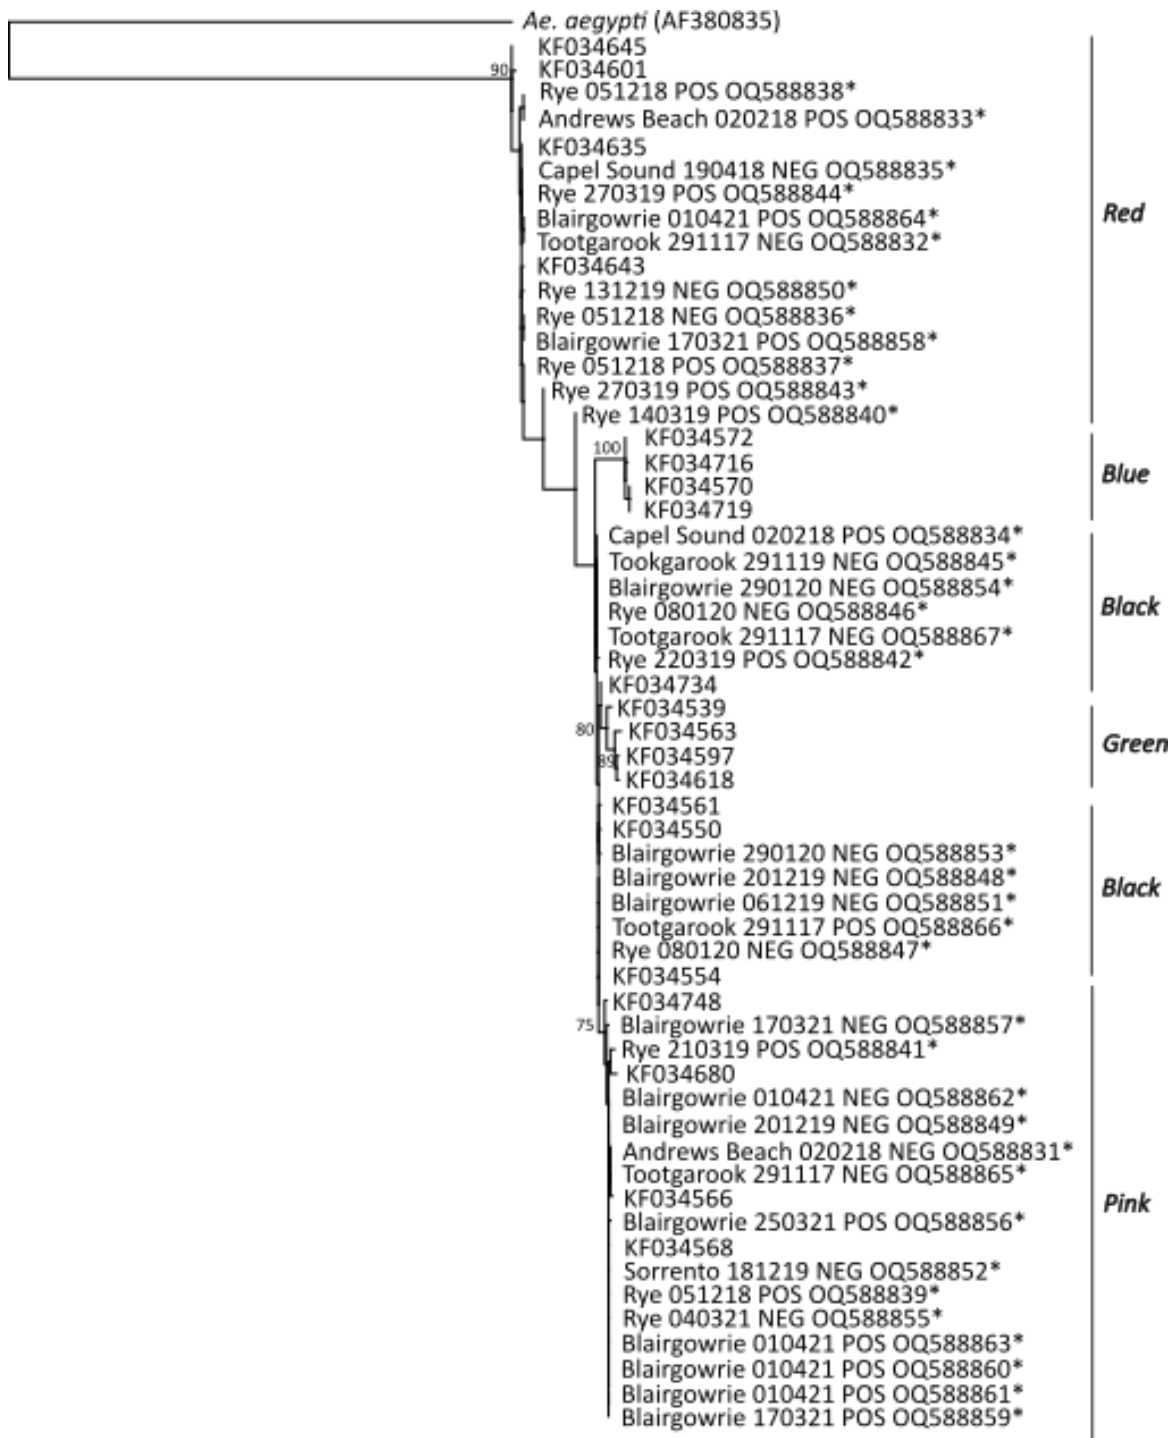

**Supplementary Fig. 1 | Maximum likelihood phylogenetic tree based on an 871 bp region of the COI gene.** Labelling indicates capture location, collection date, *M. ulcerans* infection status and accession number. Clades are labelled based on Endersby et al. 2013, with four well-supported clades (blue, red, green and pink) and a fifth poorly supported clade (black). Insects from the blue clade had previously been collected in the subtropics of Queensland (QLD), green in the tropics of QLD, pink in temperate southern Australia, red from a broad distribution along the east coast and black from New Zealand and south-eastern Australia. The Hasegawa-Kishino-Yano (HKY) substitution model was used with 1,000 bootstrap replicates. Bootstrap proportions (BSP  $\geq$  70%) are indicated alongside the nodes. The number of nucleotide substitutions per site is represented by the scale bar. *Aedes aegypti* was used as an outgroup. \* DNA Sequences generated in this study.

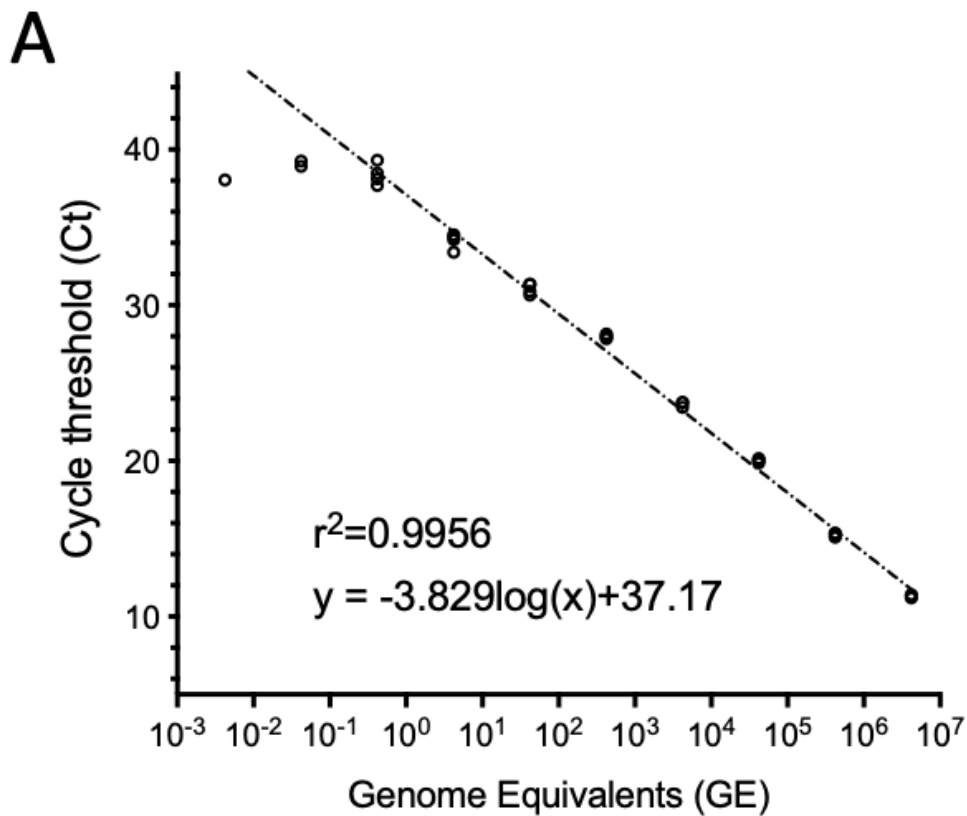

**B**

| gDNA conc. (ng/ $\mu$ L) | Genome Equivalents | Rep 1 | Rep 2 | Rep 3 | Rep 4 |
|--------------------------|--------------------|-------|-------|-------|-------|
| 12.1                     | 4200000            | 11.34 | 11.2  | 11.4  | 11.27 |
| 1.2                      | 420000             | 15.09 | 15.17 | 15.35 | 15.35 |
| 0.12                     | 42000              | 19.87 | 20.02 | 20.05 | 20.15 |
| 0.012                    | 4200               | 23.75 | 23.74 | 23.44 | -     |
| 0.0012                   | 420                | 27.95 | 28.02 | 27.84 | 28.16 |
| 0.00012                  | 42                 | 30.89 | 31.34 | 31.35 | 30.66 |
| 0.000012                 | 4.2                | 34.38 | 33.4  | 34.53 | 34.21 |
| 0.0000012                | 0.42               | 39.32 | 37.68 | 38.47 | 38.12 |

**Supplementary Fig. 2 | IS2404 qPCR standard curve.** (A) Plot of 10-fold dilution series of *M. ulcerans* genomic DNA tested by IS2404 Taqman real-time PCR (each dilution tested in quadruplicate). The x-axis is  $\log_{10}$  scale. (B) Cycle-threshold (Ct) values for each genomic DNA dilution used to prepare the plot in (A). Results for four independent qPCR reactions are shown.

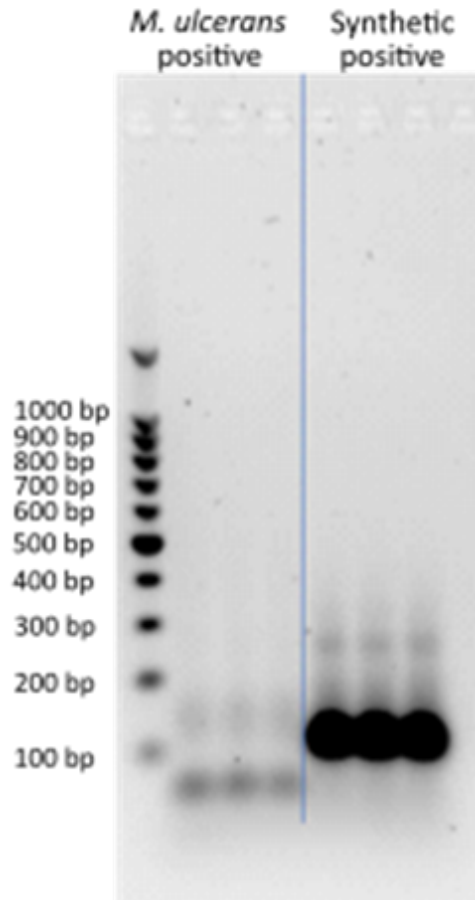

**Supplementary Fig. 3 | IS2404 qPCR synthetic positive control.** Comparison of the size of the qPCR amplicon (electrophoresis on 1% agarose gel) between a real *M. ulcerans* positive control using genomic DNA and the synthetic DNA positive control used for the screening assays.
